# Supplementary material for: Family photo: Brian, Rubye, Ben, and Tamara Hampton
Source: MDPI journal article supplement (doi:10.3390/jcm11051239), 2012-01-01
Supplement: s1 [file s1]

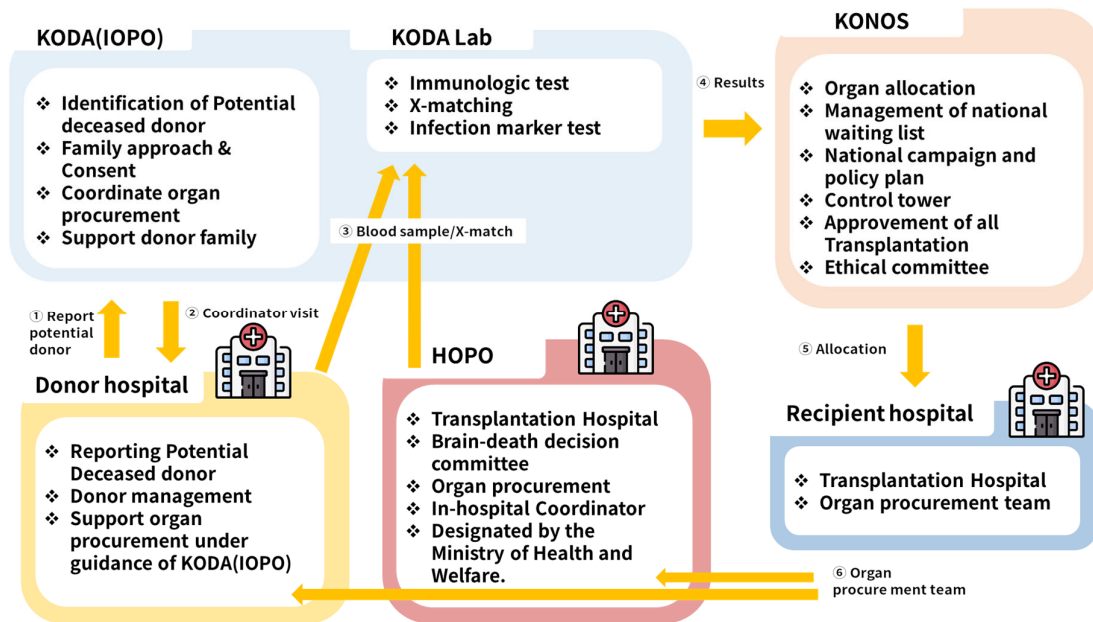

**Figure S1.** Flowchart of potential deceased donor organ procurement in South Korea; KODA, Korea Organ Donation Agency; KONOS, Korean Network for Organ Sharing; IOPO, Independent Organ-Procurement Organization); HOPO, Hospital-based Organ-Procurement Organization
